# Supplementary material
Source: PubMed Central journal article supplement (PMC5396460)
Supplement: NIHMS839391-supplement-01.pdf [file NIHMS839391-supplement-01.pdf]

**Supplemental Table 1. Abbreviations Used**

| <b>Abbreviation</b> | <b>Term</b>                                                  |
|---------------------|--------------------------------------------------------------|
| AI                  | Aromatase inhibitor                                          |
| AS                  | Ascites                                                      |
| AU                  | Australia                                                    |
| CFP                 | Cleared Mammary Fat Pad                                      |
| CH                  | Switzerland                                                  |
| CR                  | Charles River Laboratories                                   |
| E2 Water            | Estradiol-supplemented Water                                 |
| FNA                 | Fine Needle Aspirate                                         |
| FR                  | France                                                       |
| HGF                 | Hepatocyte growth factor                                     |
| ID                  | Intraductal Injection                                        |
| IFP                 | Intact Mammary Fat Pad                                       |
| JAX                 | Jackson Laboratory                                           |
| NA                  | Not applicable                                               |
| nr                  | Not reported                                                 |
| OM                  | Other Metastatic Site                                        |
| PE                  | Pleural Effusion                                             |
| Pellet              | Slow-release Plastic Pellet                                  |
| PT                  | Primary tumor                                                |
| QPCR                | Quantitative reverse transcriptase polymerase chain reaction |
| RC                  | Renal Capsule                                                |
| SERD                | Selective estrogen receptor downregulator                    |
| SERM                | Selective estrogen receptor modulator                        |
| Si-Pellet           | Silastic tubing pellet                                       |
| SQ-F                | Subcutaneous - Flank                                         |
| SQ-S                | Subcutaneous - Suprascapular Fat Pad                         |
| UK                  | United Kingdom                                               |
| USA                 | United States of America                                     |
